# Supplementary material
Source: bioRxiv or medRxiv preprint supplement (https://www.biorxiv.org/highwire/filestream/111028/field_highwire_adjunct_files/0/366039-1.pdf)
Supplement: Supplementary file [file 366039-1.pdf]

## Supplementary Materials

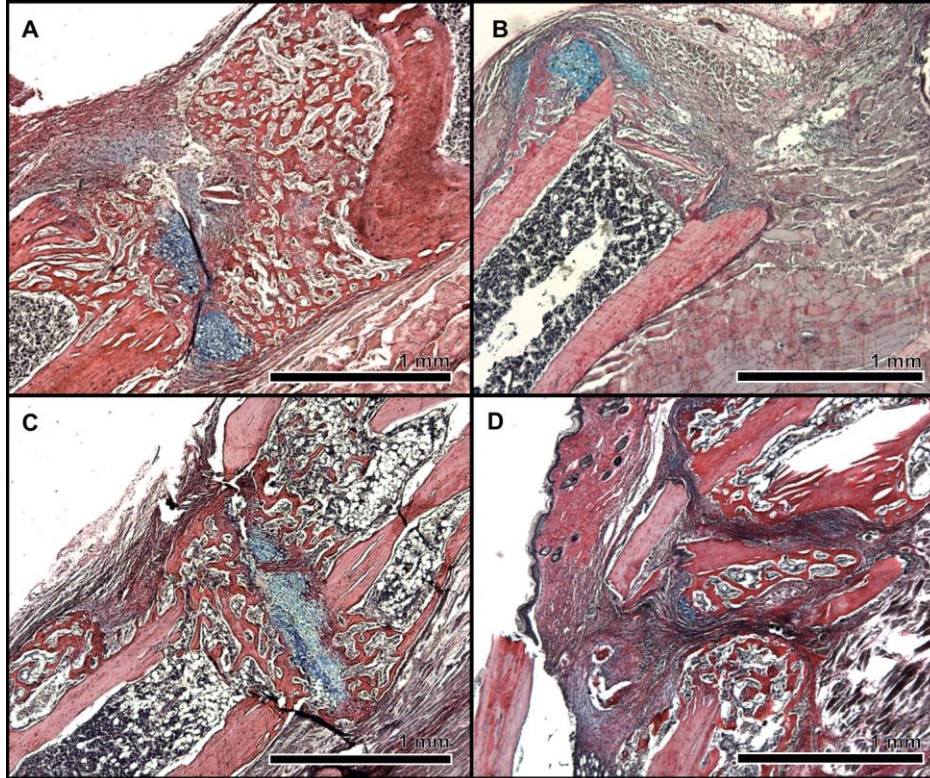

**Fig. S1 - Original histology images of external fixator model samples (Fig. 2A-B,D-E).**

Histology sections are stained with HBQ (blue = cartilage, red = bone). (A) Original image of the histology section in Fig. 2A of an externally-fixed 0.5 mm defect at 14 days post-fracture. (B) Original image of the histology section in Fig. 2B of an externally-fixed 2 mm defect at 14 days post-fracture. (C) Original image of the histology section in Fig. 2D of an externally-fixed well-healed mouse at day 28. (D) Original image of the histology section in Fig. 2E of an externally-fixed poorly-healed mouse at day 28.

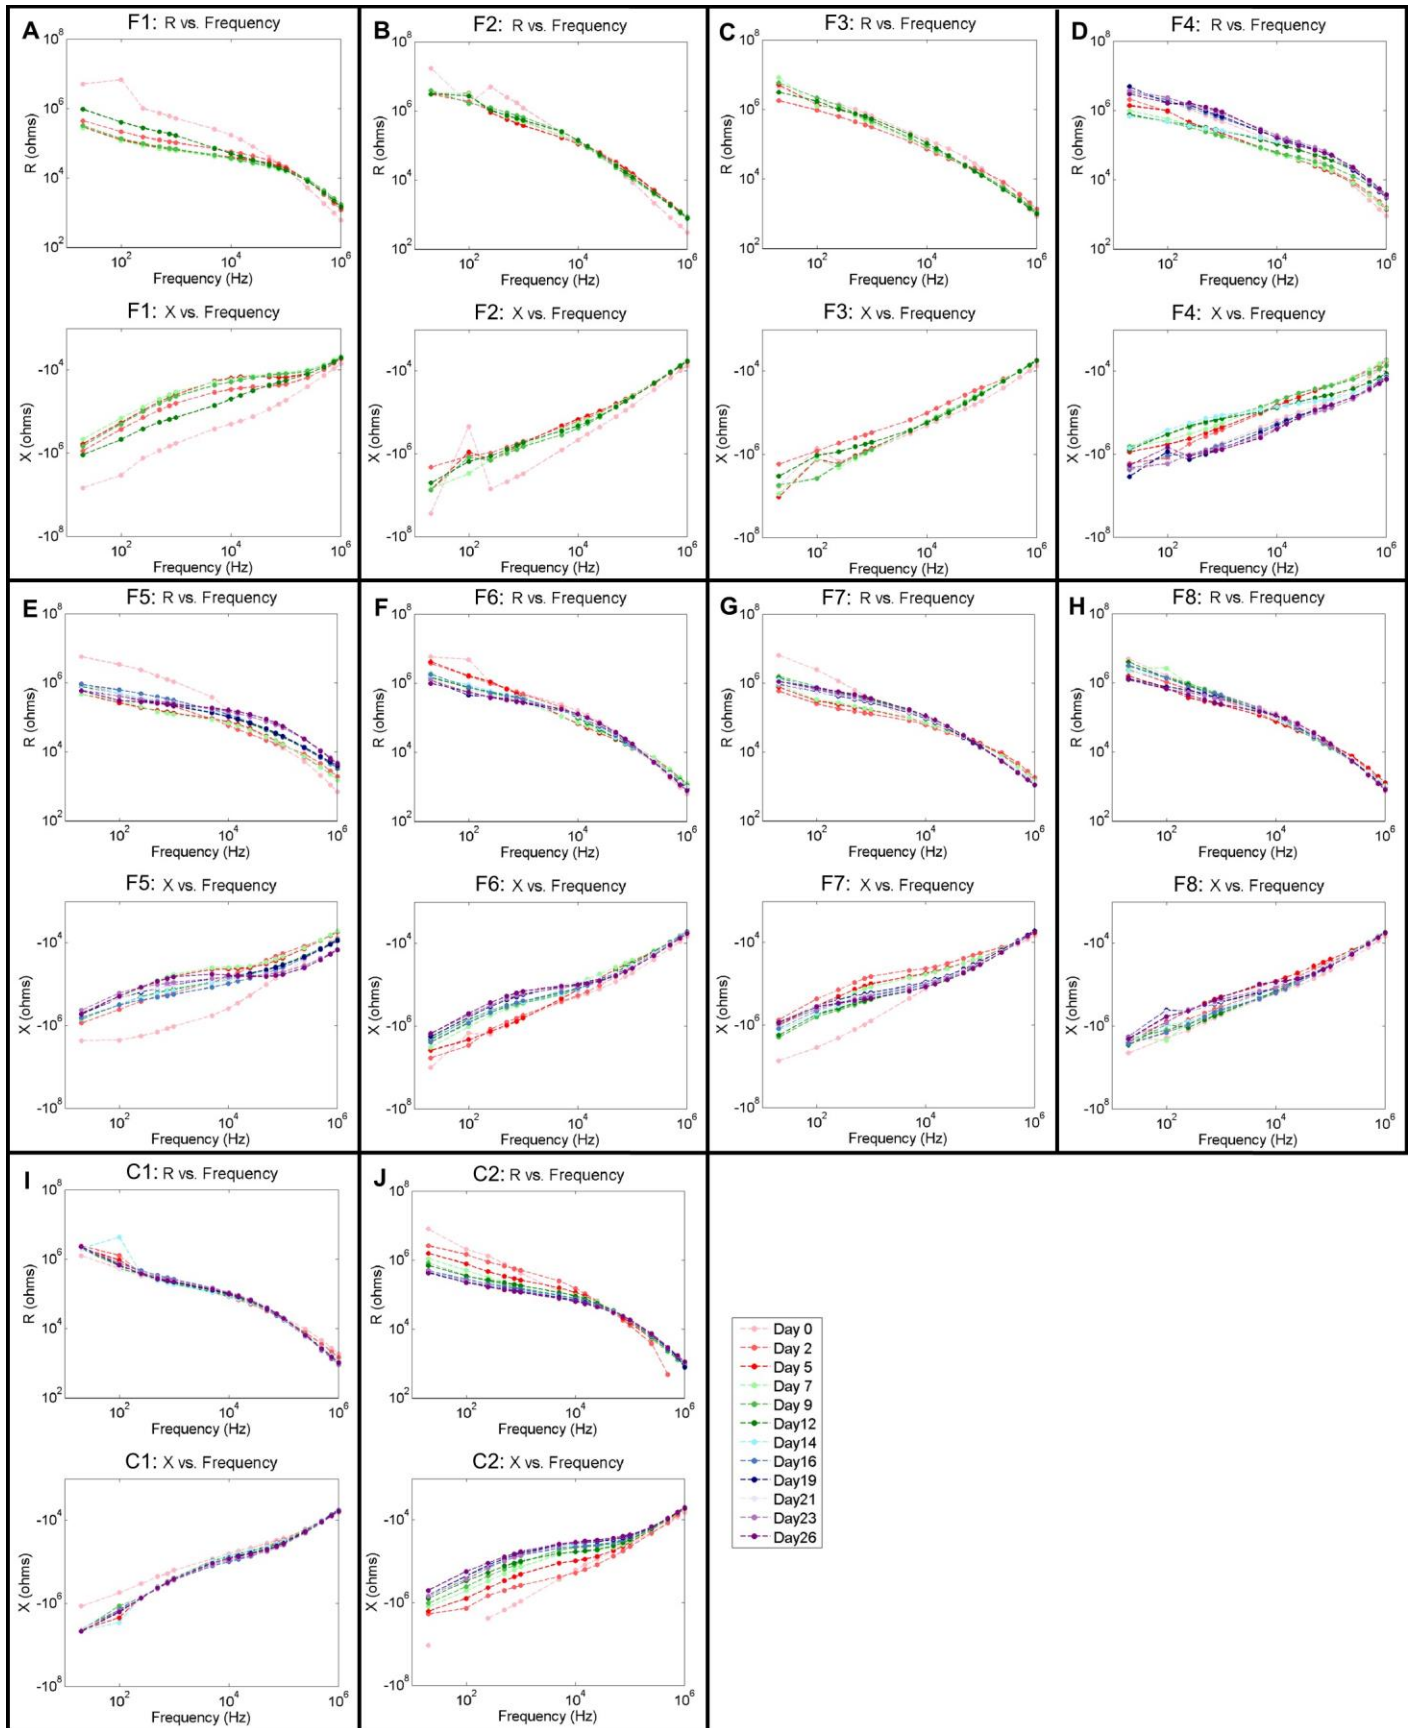

**Fig. S2 - Frequency response over time in all bone plate model mice.**

(A-C) Electrical resistance ( $R$ ) and reactance ( $X$ ) plotted as a function of frequency for each measurement day in mice sacrificed on day 12. (D-F)  $R$  and  $X$  plotted as a function of frequency for each measurement day in mice sacrificed on day 26 with calluses composed nearly completely of new trabecular bone. (G-H)  $R$  and  $X$  plotted as a function of frequency for each measurement day in mice sacrificed on day 26 that experienced mixed healing. (I-J)  $R$  and  $X$  plotted as a function of frequency for each measurement day for control mice.

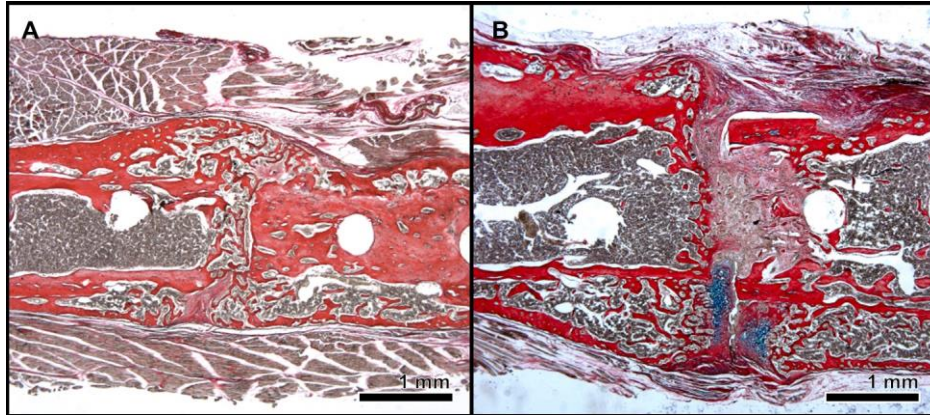

**Fig. S3 - Original histology images of healing and non-healing bone plate model samples (Fig. 4A,E).**

Histology sections are stained with HBQ (blue = cartilage, red = bone). (A) Original image of the histology section in Fig. 4A of a fracture fixed with a bone plate at 26 days post-fracture that was well-healed. (B) Original image of the histology section in Fig. 4E of a fracture fixed with a bone plate at 26 days post-fracture that had a mixed healing response.

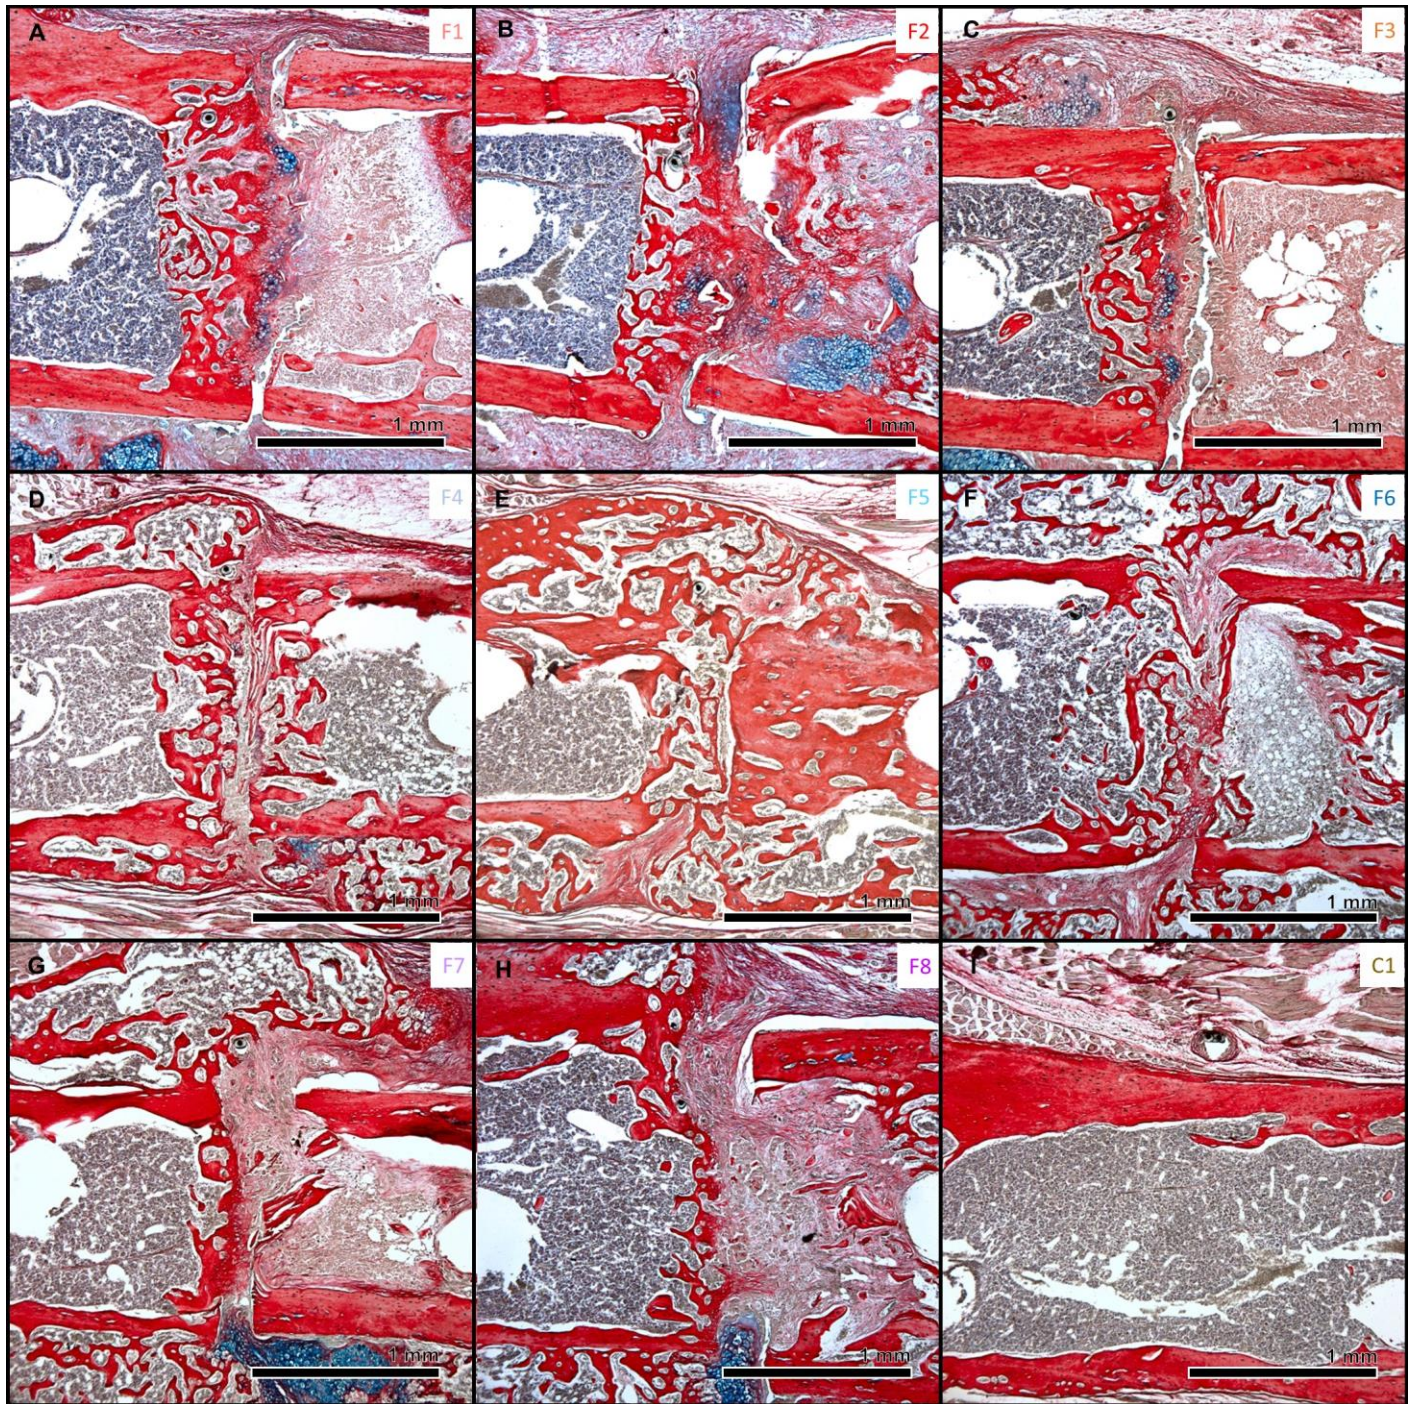

**Fig. S4 - Original histology images of all bone plate model samples (Fig. 5).**

Histology sections in this figure are stained with HBQ (blue = cartilage, red = bone). **(A-C)** Original images of the histology sections in Fig. 5A-C of mice sacrificed on day 12. **(D-F)** Original images of the histology sections in Fig. 5D-F of mice sacrificed on day 26 with calluses composed nearly completely of new trabecular bone. **(G-H)** Original images of the histology sections in Fig. 5G-H of mice sacrificed on day 26 that experienced mixed healing. **(I)** Original image of the histology section in Fig. 5I of a control mouse on day 26.

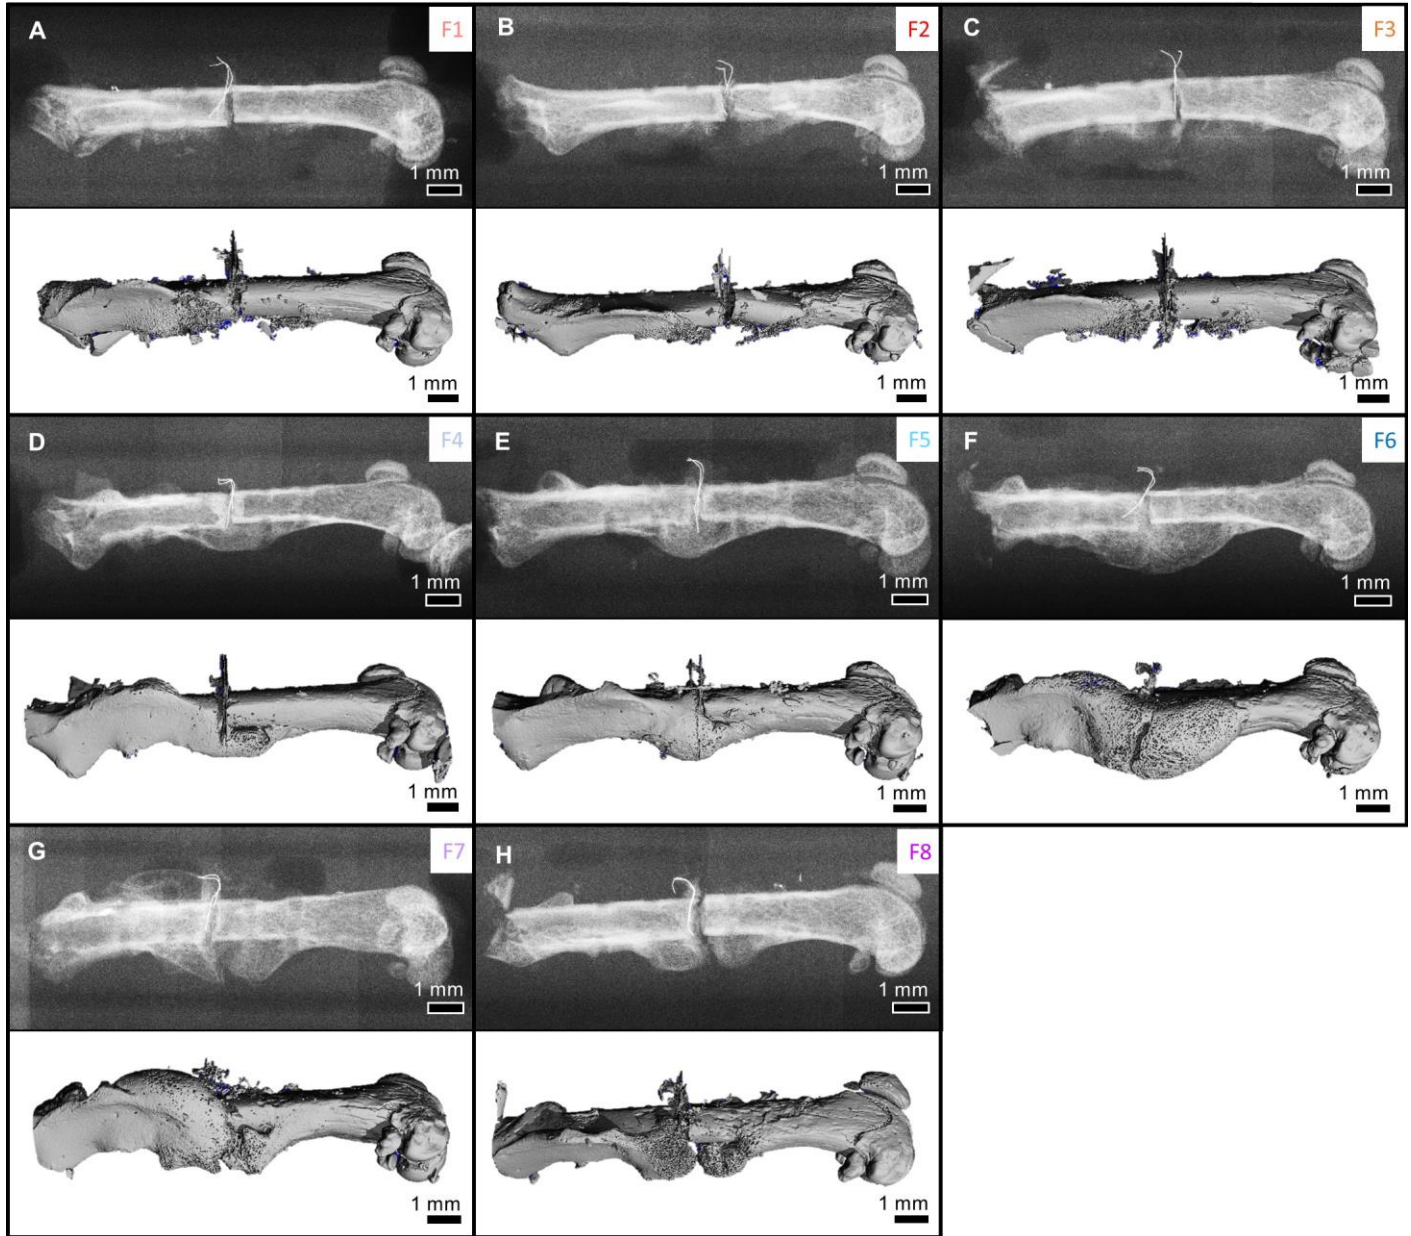

**Fig. S5 - X-ray and  $\mu$ CT images of all bone plate model fracture samples.**

(A-C) X-ray and  $\mu$ CT images of femurs from mice sacrificed on day 12. (D-F) X-ray and  $\mu$ CT images of femurs from mice sacrificed on day 26 with calluses composed nearly completely of new trabecular bone. (G-H) X-ray and  $\mu$ CT images of femurs from mice sacrificed on day 26 that experienced mixed healing.

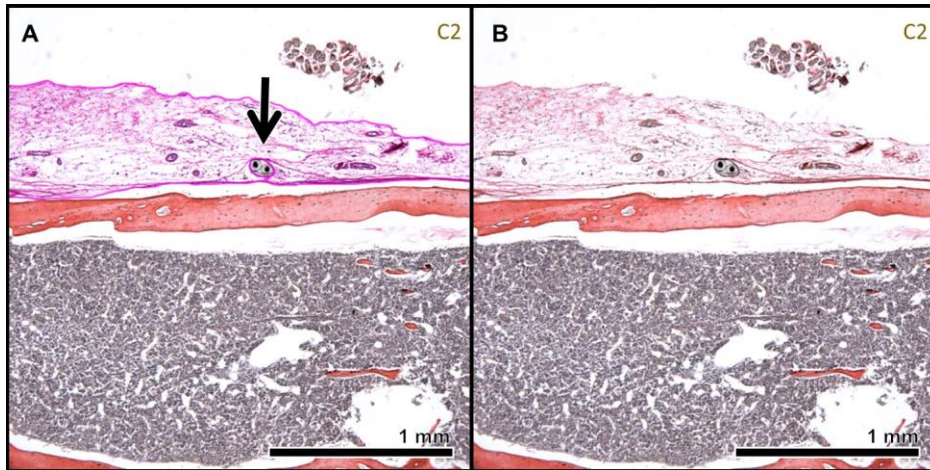

**Fig. S6 - Histology image for control mouse.**

Histology sections in this figure are stained with HBQ (blue = cartilage, red = bone). (A) Histology section is false-colored to aid interpretation of tissue composition. Purple = fibrous/amorphous tissue. Original red color = cortical bone, black/white area = bone marrow. Black arrow points to sensors embedded in fibrous tissue next to the unfractured bone. (B) Original histology section from (A).

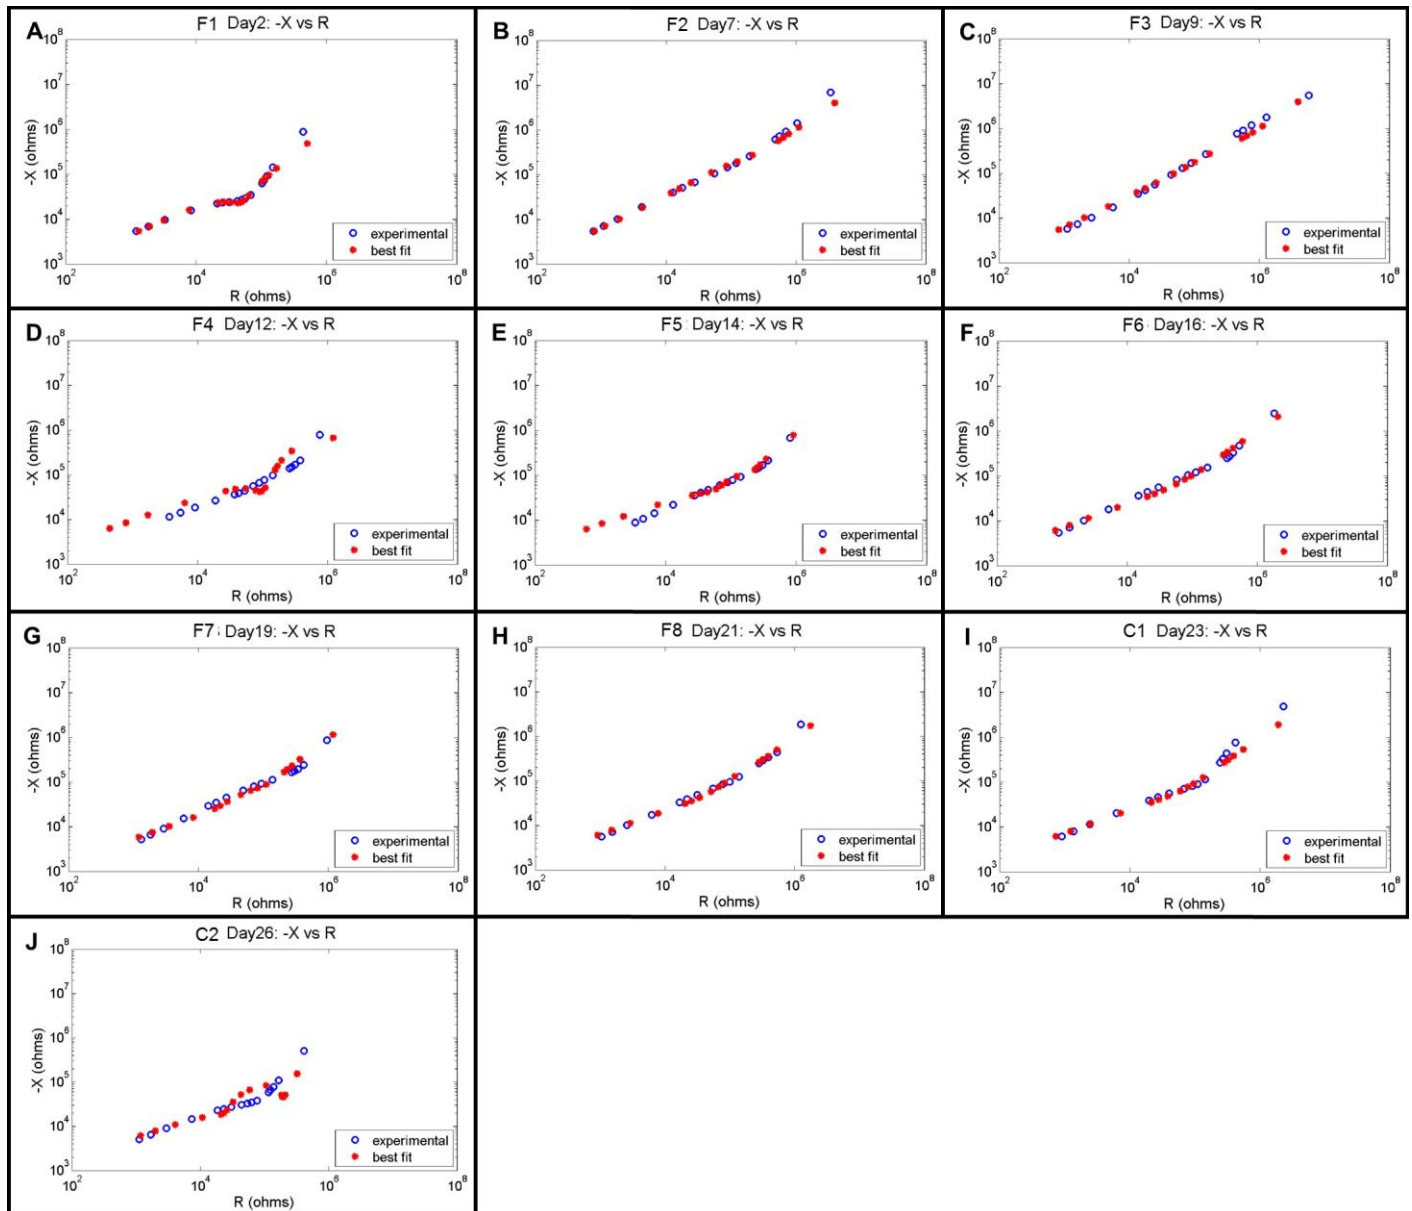

**Fig. S7 - Goodness of fits for data fit to equivalent circuit model.**

Representative set of graphs depicting the experimental values and best fit values derived from the equivalent circuit model of electrical reactance plotted over electrical resistance.

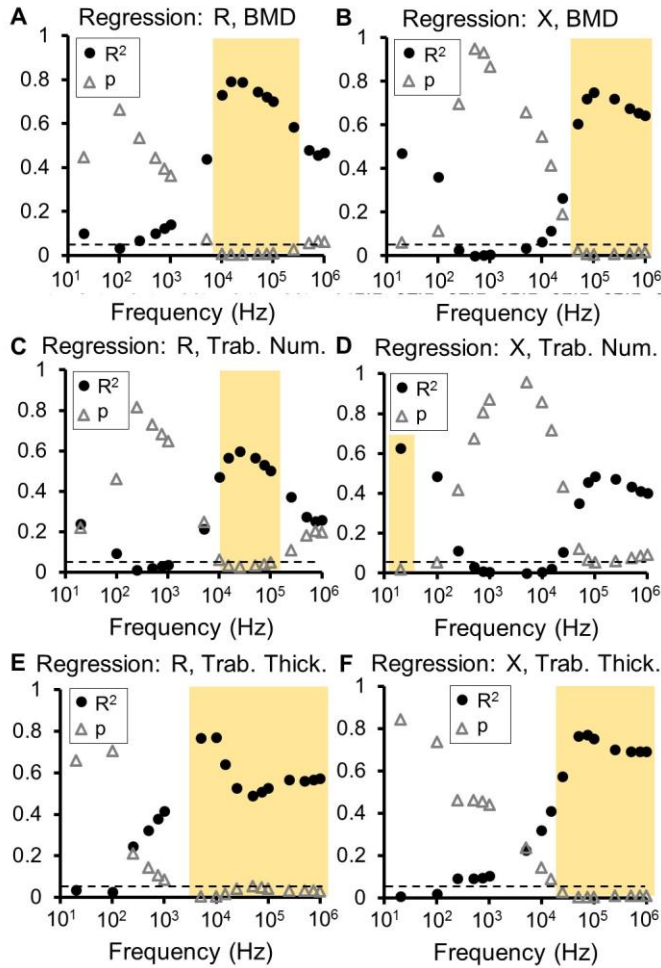

**Fig. S8 - Clinically-relevant frequencies of operation with significant correlation between impedance data and  $\mu$ CT.**

Resultant  $R^2$  and  $p$  values from regression analyses comparing normalized R and X with bone mineral density (BMD), trabecular number, and trabecular thickness. Significance is set at  $p < 0.05$  (below dashed line).

| Sample | Surgeon 1 |          |          |       |          | Surgeon 2 |          |          |       |          |
|--------|-----------|----------|----------|-------|----------|-----------|----------|----------|-------|----------|
|        | Cortex 1  | Cortex 2 | Cortex 3 | Total | Category | Cortex 1  | Cortex 2 | Cortex 3 | Total | Category |
| F1     | 1         | 2        | 2        | 5     | NU       | 2         | 1        | 2        | 5     | SNU      |
| F2     | 2         | 2        | 2        | 6     | NU       | 2         | 1        | 2        | 5     | SNU      |
| F3     | 3         | 2        | 2        | 7     | SNU      | 2         | 1        | 2        | 5     | SNU      |
| F4     | 3         | 2        | 3        | 8     | U        | 3         | 3        | 3        | 9     | U        |
| F5     | 3         | 2        | 3        | 8     | U        | 3         | 3        | 3        | 9     | U        |
| F6     | 3         | 3        | 3        | 9     | SNU      | 3         | 3        | 3        | 9     | SNU      |
| F7     | 2         | 2        | 2        | 6     | NU       | 2         | 2        | 2        | 6     | NU       |
| F8     | 3         | 3        | 3        | 9     | U        | 3         | 3        | 3        | 9     | U        |

  

| Sample | Surgeon 3 |          |          |       |          | Surgeon 4 |          |          |       |          |
|--------|-----------|----------|----------|-------|----------|-----------|----------|----------|-------|----------|
|        | Cortex 1  | Cortex 2 | Cortex 3 | Total | Category | Cortex 1  | Cortex 2 | Cortex 3 | Total | Category |
| F1     | 1         | 1        | 1        | 3     | NU       | 1         | 2        | 2        | 5     | SNU      |
| F2     | 1         | 1        | 1        | 3     | NU       | 2         | 1        | 2        | 5     | SNU      |
| F3     | 2         | 1        | 2        | 5     | NU       | 2         | 2        | 2        | 6     | SNU      |
| F4     | 3         | 2        | 3        | 8     | U        | 3         | 3        | 3        | 9     | U        |
| F5     | 3         | 2        | 3        | 8     | U        | 3         | 3        | 3        | 9     | U        |
| F6     | 3         | 3        | 3        | 9     | U        | 3         | 3        | 3        | 9     | SNU      |
| F7     | 3         | 3        | 2        | 8     | NU       | 2         | 3        | 2        | 7     | SNU      |
| F8     | 3         | 3        | 3        | 9     | U        | 3         | 3        | 3        | 9     | U        |



| Sample | Surgeon 5 |          |          |       |          |
|--------|-----------|----------|----------|-------|----------|
|        | Cortex 1  | Cortex 2 | Cortex 3 | Total | Category |
| F1     | 2         | 2        | 2        | 6     | SNU      |
| F2     | 2         | 1        | 2        | 5     | SNU      |
| F3     | 2         | 3        | 2        | 7     | SNU      |
| F4     | 3         | 2        | 3        | 8     | U        |
| F5     | 3         | 4        | 3        | 10    | U        |
| F6     | 3         | 3        | 3        | 9     | U        |
| F7     | 3         | 2        | 3        | 8     | U        |
| F8     | 3         | 3        | 3        | 9     | U        |

**Table S1 – Modified RUST scores of bone plate model samples.**

Five surgeons scored each cortex (excluding the anterior cortex) from 1 to 4: 1 = no callus, 2 = callus present, 3 = bridging callus, 4 = remodeled with no visible fracture line. Scores from the three cortices for each sample were added to generate a total score between 3 and 12. Each surgeon also clinically categorized each sample as union (U), nonunion (NU), or suspected nonunion (SNU).

| Mouse | Day | Bone Volume (BV) | Total Volume (TV) | BV/TV  | Bone Mineral Density (BMD) | Trabecular Number | Trabecular Thickness | Trabecular Separation |
|-------|-----|------------------|-------------------|--------|----------------------------|-------------------|----------------------|-----------------------|
| F1    | 12  | 0.2129           | 2.4666            | 0.0863 | 135.8959                   | 3.3514            | 0.0489               | 0.3197                |
| F2    | 12  | 0.1029           | 2.3747            | 0.0433 | 99.1292                    | 2.9957            | 0.0504               | 0.3456                |
| F3    | 12  | 0.1831           | 2.6416            | 0.0693 | 116.7744                   | 2.2935            | 0.0607               | 0.4634                |
| F4    | 26  | 1.7574           | 4.6154            | 0.3808 | 335.406                    | 8.2039            | 0.069                | 0.1146                |
| F5    | 26  | 2.38             | 5.9458            | 0.4003 | 355.0899                   | 9.0805            | 0.0645               | 0.1023                |
| F6    | 26  | 3.8163           | 16.4001           | 0.2327 | 219.9742                   | 7.226             | 0.045                | 0.134                 |
| F7    | 26  | 2.6295           | 9.2405            | 0.2846 | 260.3964                   | 7.3311            | 0.0528               | 0.1405                |
| F8    | 26  | 1.8757           | 7.4606            | 0.2514 | 237.9708                   | 7.302             | 0.0489               | 0.1401                |

**Table S2 – Quantified  $\mu$ CT indices for bone plate model samples.**

The cortical surface and bone morphology for each sample was assessed from  $\mu$ CT scans in the region between the central surgical screws, and a number of three-dimensional microstructural indices are reported here.

| Normalized Resistance (R) |                |      |      |      |      |      |      |      |      |      |      |      |      |      |      |      |      |      |
|---------------------------|----------------|------|------|------|------|------|------|------|------|------|------|------|------|------|------|------|------|------|
|                           | Freq (Hz)      | 20   | 100  | 250  | 500  | 750  | 1k   | 5k   | 10k  | 15k  | 25k  | 50k  | 75k  | 100k | 250k | 500k | 750k | 1M   |
| BV/TV                     | R <sup>2</sup> | 0.12 | 0.04 | 0.06 | 0.09 | 0.12 | 0.13 | 0.41 | 0.69 | 0.76 | 0.75 | 0.70 | 0.68 | 0.65 | 0.53 | 0.43 | 0.40 | 0.41 |
|                           | p              | 0.41 | 0.65 | 0.55 | 0.46 | 0.41 | 0.38 | 0.09 | 0.01 | 0.01 | 0.01 | 0.01 | 0.01 | 0.02 | 0.04 | 0.08 | 0.09 | 0.09 |
| BMD                       | R <sup>2</sup> | 0.10 | 0.03 | 0.07 | 0.10 | 0.12 | 0.14 | 0.44 | 0.73 | 0.79 | 0.79 | 0.75 | 0.72 | 0.70 | 0.58 | 0.48 | 0.46 | 0.47 |
|                           | p              | 0.45 | 0.66 | 0.53 | 0.45 | 0.39 | 0.36 | 0.07 | 0.01 | 0.00 | 0.00 | 0.01 | 0.01 | 0.01 | 0.03 | 0.06 | 0.07 | 0.06 |
| Trab. Num.                | R <sup>2</sup> | 0.24 | 0.09 | 0.01 | 0.02 | 0.03 | 0.04 | 0.21 | 0.47 | 0.56 | 0.60 | 0.56 | 0.53 | 0.50 | 0.37 | 0.27 | 0.25 | 0.26 |
|                           | p              | 0.22 | 0.46 | 0.82 | 0.73 | 0.68 | 0.65 | 0.25 | 0.06 | 0.03 | 0.02 | 0.03 | 0.04 | 0.05 | 0.11 | 0.18 | 0.21 | 0.20 |
| Trab. Thick.              | R <sup>2</sup> | 0.03 | 0.03 | 0.25 | 0.32 | 0.38 | 0.41 | 0.77 | 0.77 | 0.64 | 0.53 | 0.49 | 0.51 | 0.53 | 0.57 | 0.56 | 0.57 | 0.57 |
|                           | p              | 0.66 | 0.71 | 0.21 | 0.14 | 0.10 | 0.09 | 0.00 | 0.00 | 0.02 | 0.04 | 0.05 | 0.05 | 0.04 | 0.03 | 0.03 | 0.03 | 0.03 |
| Trab. Sep.                | R <sup>2</sup> | 0.24 | 0.09 | 0.01 | 0.01 | 0.02 | 0.02 | 0.13 | 0.29 | 0.36 | 0.40 | 0.39 | 0.37 | 0.35 | 0.27 | 0.20 | 0.18 | 0.18 |
|                           | p              | 0.22 | 0.48 | 0.84 | 0.78 | 0.74 | 0.71 | 0.39 | 0.17 | 0.12 | 0.09 | 0.10 | 0.11 | 0.12 | 0.19 | 0.27 | 0.30 | 0.29 |
| Normalized Reactance (X)  |                |      |      |      |      |      |      |      |      |      |      |      |      |      |      |      |      |      |
|                           | Freq (Hz)      | 20   | 100  | 250  | 500  | 750  | 1k   | 5k   | 10k  | 15k  | 25k  | 50k  | 75k  | 100k | 250k | 500k | 750k | 1M   |
| BV/TV                     | R <sup>2</sup> | 0.50 | 0.39 | 0.03 | 0.00 | 0.00 | 0.00 | 0.03 | 0.06 | 0.11 | 0.25 | 0.58 | 0.69 | 0.71 | 0.67 | 0.63 | 0.60 | 0.59 |
|                           | p              | 0.05 | 0.10 | 0.67 | 0.93 | 0.94 | 0.88 | 0.68 | 0.56 | 0.43 | 0.20 | 0.03 | 0.01 | 0.01 | 0.01 | 0.02 | 0.02 | 0.03 |
| BMD                       | R <sup>2</sup> | 0.47 | 0.36 | 0.03 | 0.00 | 0.00 | 0.01 | 0.03 | 0.06 | 0.11 | 0.26 | 0.60 | 0.72 | 0.75 | 0.72 | 0.68 | 0.65 | 0.64 |
|                           | p              | 0.06 | 0.11 | 0.70 | 0.95 | 0.93 | 0.87 | 0.66 | 0.55 | 0.41 | 0.19 | 0.02 | 0.01 | 0.01 | 0.01 | 0.01 | 0.02 | 0.02 |
| Trab. Num.                | R <sup>2</sup> | 0.63 | 0.49 | 0.11 | 0.03 | 0.01 | 0.00 | 0.00 | 0.01 | 0.02 | 0.11 | 0.35 | 0.46 | 0.49 | 0.47 | 0.43 | 0.41 | 0.40 |
|                           | p              | 0.02 | 0.06 | 0.42 | 0.68 | 0.81 | 0.87 | 0.96 | 0.86 | 0.72 | 0.43 | 0.12 | 0.07 | 0.05 | 0.06 | 0.08 | 0.09 | 0.09 |
| Trab. Thick.              | R <sup>2</sup> | 0.01 | 0.02 | 0.09 | 0.09 | 0.10 | 0.10 | 0.22 | 0.32 | 0.41 | 0.57 | 0.76 | 0.77 | 0.75 | 0.70 | 0.69 | 0.69 | 0.69 |
|                           | p              | 0.84 | 0.74 | 0.46 | 0.46 | 0.46 | 0.44 | 0.24 | 0.14 | 0.09 | 0.03 | 0.00 | 0.00 | 0.01 | 0.01 | 0.01 | 0.01 | 0.01 |
| Trab. Sep.                | R <sup>2</sup> | 0.64 | 0.42 | 0.11 | 0.03 | 0.01 | 0.00 | 0.00 | 0.00 | 0.01 | 0.06 | 0.21 | 0.28 | 0.30 | 0.31 | 0.28 | 0.27 | 0.27 |
|                           | p              | 0.02 | 0.08 | 0.43 | 0.70 | 0.83 | 0.89 | 0.96 | 0.90 | 0.80 | 0.57 | 0.25 | 0.18 | 0.16 | 0.16 | 0.17 | 0.18 | 0.19 |

**Table S3 – Resulting R<sup>2</sup> and p values from regression analyses comparing impedance to quantified  $\mu$ CT indices.**

Regression analyses was performed to compare normalized electrical resistance (R) and reactance (X) to each of the reported  $\mu$ CT indices. The resultant R<sup>2</sup> and p values associated with each relationship are provided with 2 significant digits. If the p-value is listed as 0.00, this indicates a value less than 0.01. Significance is set as p < 0.05, with significant p-values underlined.
